# Supplementary material for: Relevance of Hydrogen Bonds for the Histamine H2 Receptor-Ligand Interactions: A Lesson from Deuteration
Source: MDPI journal article supplement (doi:10.3390/biom10020196), 2020-01-29
Supplement: s1 [file s1]

# Supporting Information

## Relevance of hydrogen bonds for the histamine H2 receptor-ligand interactions:

### A lesson from deuteration<sup>†</sup>

Mojca Kržan<sup>1‡</sup>, Jan Keuschler<sup>1‡</sup>, Janez Mavri<sup>2</sup>, Robert Vianello<sup>3,\*</sup>

<sup>1</sup> Institute of Pharmacology and Experimental Toxicology, Faculty of Medicine, University of Ljubljana, Vrazov trg 2, Ljubljana, Slovenia

<sup>2</sup> Laboratory for Computational Biochemistry and Drug Design, National Institute of Chemistry, Hajdrihova 19, Ljubljana, Slovenia

<sup>3</sup> Division of Organic Chemistry and Biochemistry, Ruđer Bošković Institute, Bijenička cesta 54, Zagreb, Croatia. Tel.: +385-1-4561117. Fax: +385-1-4680084. Email: robert.vianello@irb.hr

<sup>†</sup> This paper is dedicated to the memory of Prof. Dušan Hadži (1921–2019), a prominent researcher with a large impact on the hydrogen bond research, who recently passed away

<sup>‡</sup> Both authors contributed equally to this work

| CONTENTS                                                                                                                                                                                                                                                                                                                              | PAGE |
|---------------------------------------------------------------------------------------------------------------------------------------------------------------------------------------------------------------------------------------------------------------------------------------------------------------------------------------|------|
| <b>Figure S1.</b> Computational scheme of 4-methylhistamine monocation <b>2</b> (top) and famotidine <b>4</b> (bottom) interacting with water molecules to calculate the energy of hydration. The choice of the dielectric constant is indicated in round brackets.                                                                   | S1   |
| <b>Figure S2.</b> Computational scheme to calculate the interaction energy between 4-methylhistamine monocation <b>2</b> (top) and famotidine <b>4</b> (bottom) with the receptor binding site. The choice of the dielectric constant is indicated in round brackets.                                                                 | S2   |
| <b>Figure S3.</b> Inhibition of the specific <sup>3</sup> H-tiotidine binding to the histamine H2 receptor with mepyramine. The obtained IC <sub>50</sub> values are 7.6 ± 0.17 (in H <sub>2</sub> O) and 7.6 ± 2.2 (in D <sub>2</sub> O), which reveal that deuteration did not cause any change in the affinity of this antagonist. | S3   |

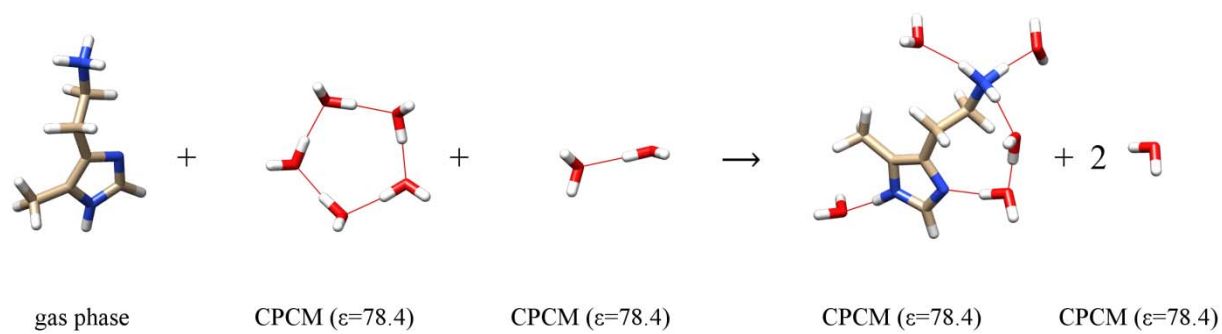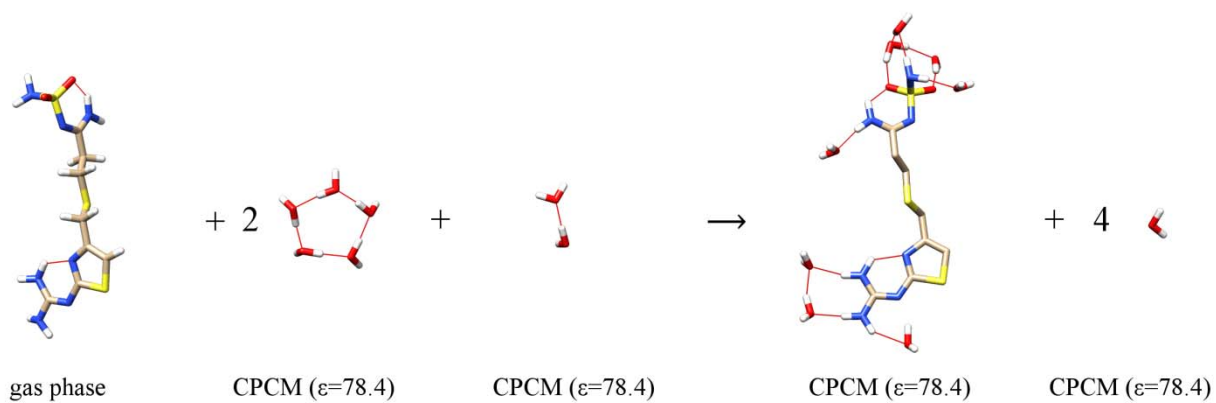

**Figure S1.** Computational scheme of 4-methylhistamine monocation **2** (top) and famotidine **4** (bottom)

interacting with water molecules to calculate the energy of hydration. The choice of the dielectric constant is indicated in round brackets.

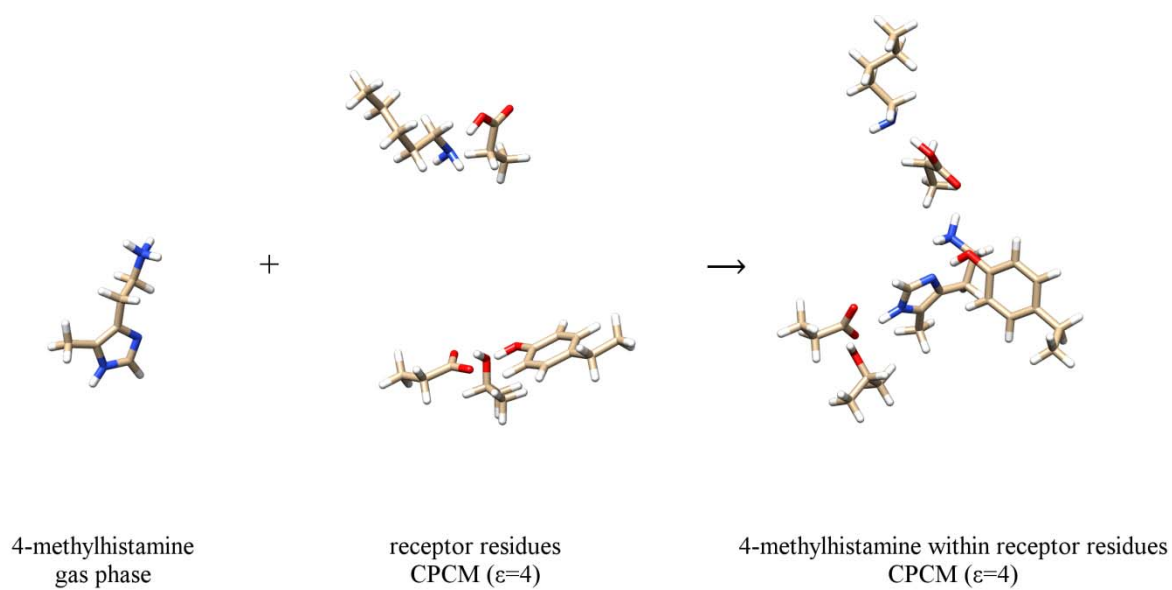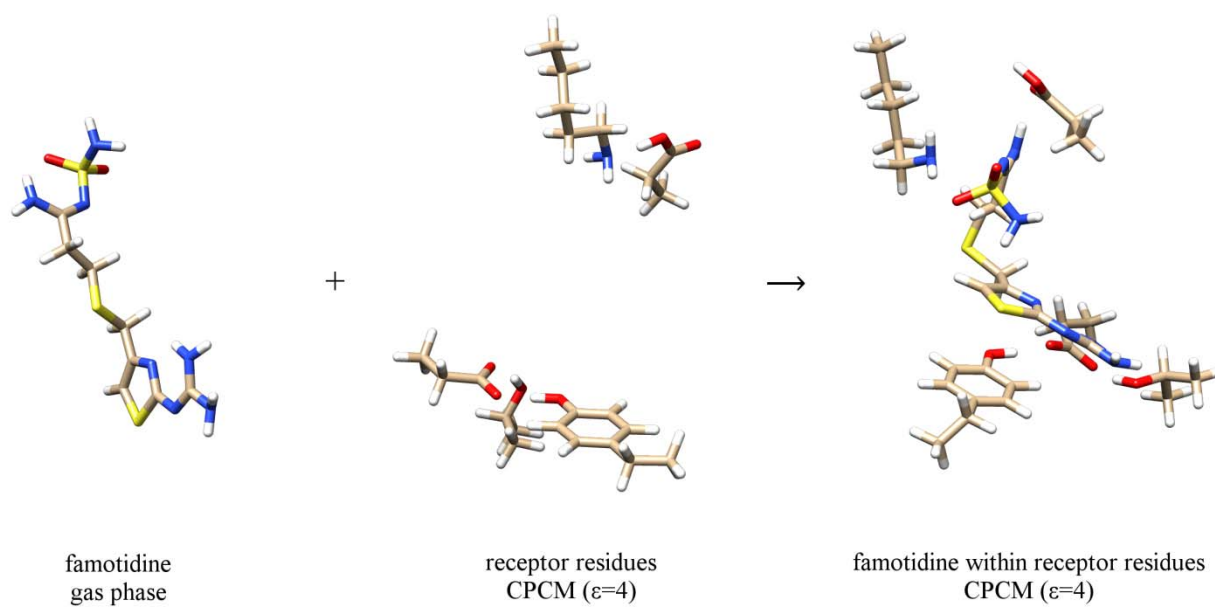

**Figure S2.** Computational scheme to calculate the interaction energy between 4-methylhistamine monocation **2** (top) and famotidine **4** (bottom) with the receptor binding site. The choice of the dielectric constant is indicated in round brackets.

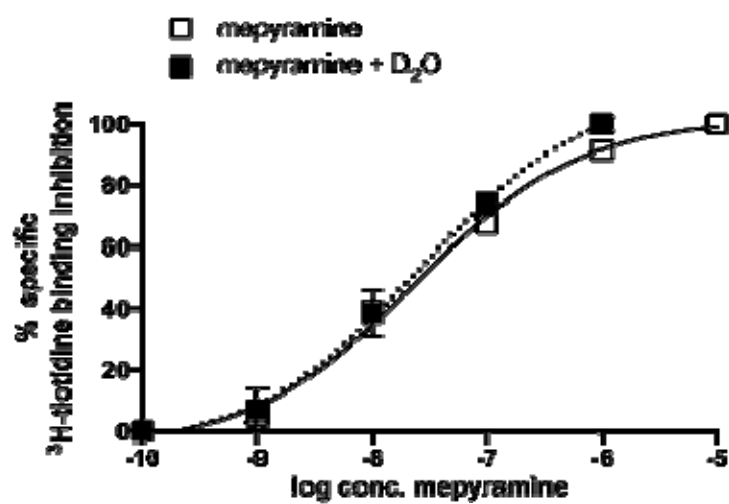

**Figure S3.** Inhibition of the specific <sup>3</sup>H-tiotidine binding to the histamine H<sub>2</sub> receptor with mepyramine. The obtained IC<sub>50</sub> values are 7.6 ± 0.17 (in H<sub>2</sub>O) and 7.6 ± 2.2 (in D<sub>2</sub>O), which reveal that deuteration did not cause any change in the affinity of this antagonist.
